# Supplementary material for: Grain boundary re-crystallization and sub-nano regions leading to high plateau figure of merit for Bi2Te3 nanoflakes
Source: Royal Society of Chemistry journal article supplement (doi:10.1039/d3ee02370b), 2023-01-01
Supplement: d3ee02370b1.pdf [file d3ee02370b1.pdf]

## Supporting Information

### Grain Boundary Re-crystallization and Sub-nano Regions Leading to High Plateau

#### Figure of Merit for Bi<sub>2</sub>Te<sub>3</sub> Nanoflakes

Wei-Di Liu,<sup>ab</sup> Liang-Cao Yin,<sup>c</sup> Lei Li,<sup>c</sup> Qishuo Yang,<sup>d</sup> De-Zhuang Wang,<sup>c</sup> Meng Li,<sup>b</sup> Xiao-Lei Shi,<sup>b</sup> Qingfeng Liu,<sup>c</sup> Yang Bai,<sup>e</sup> Ian Gentle,<sup>f</sup> Lianzhou Wang,<sup>\*a</sup> Zhi-Gang Chen<sup>\*b</sup>

#### Section S1. Parallel model

The parallel model for electrical performance analysis of a composite material can be expressed as:<sup>1</sup>

$$\sigma_c = (1 - x_v) \cdot \sigma_m + x_v \cdot \sigma_v \quad (\text{S1-1})$$

$$S_c = \frac{(1 - x_v) \cdot \sigma_m \cdot S_m + x_v \cdot \sigma_v \cdot S_v}{(1 - x_v) \cdot \sigma_m + x_v \cdot \sigma_v} \quad (\text{S1-2})$$

$\sigma$  is the electrical conductivity,  $S$  is the Seebeck coefficient,  $x_v$  is the volume fraction of secondary phase (vacuum here),  $x_v=r$  ( $r$  is the relative density),  $c$  denotes for composite,  $m$  denotes for matrix, and  $v$  denotes for vacuum. When  $\sigma_v=0$  S cm<sup>-1</sup> and  $S_v=0$  μV K<sup>-1</sup> are taken into account, it can be extracted that:

$$\sigma_c = (1 - r) \cdot \sigma_m \quad (\text{S1-3})$$

$$S_c = S_m \quad (\text{S1-4})$$

As can be seen, the porosity  $r$  influence only the  $\sigma_c$  through vacuum compositing.  $S_c$  is still determined by the  $S_m$  of the matrix material.

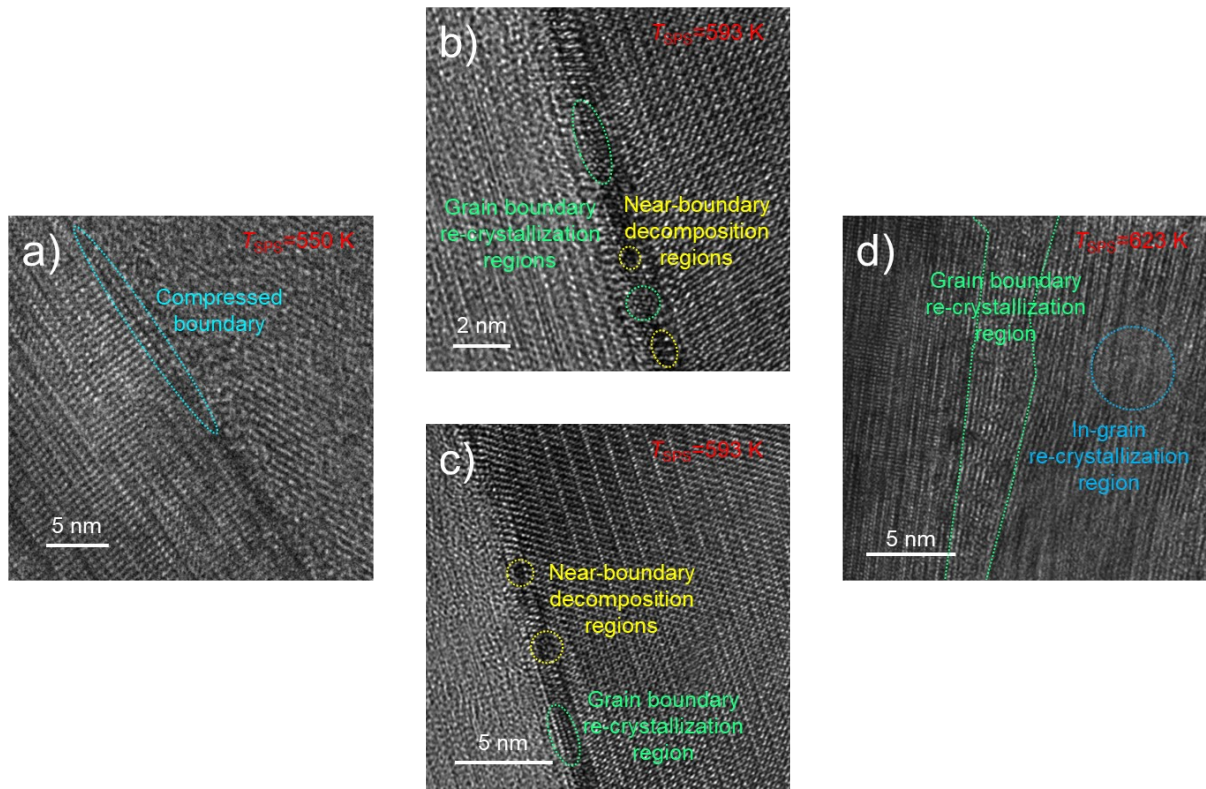

Fig. S1. High-magnification TEM images of as-sintered  $\text{Bi}_2\text{Te}_3$  pellets sintered under  $T_{\text{SPS}}$  of a) 550, b) and c) 593, and d) 623 K, respectively.

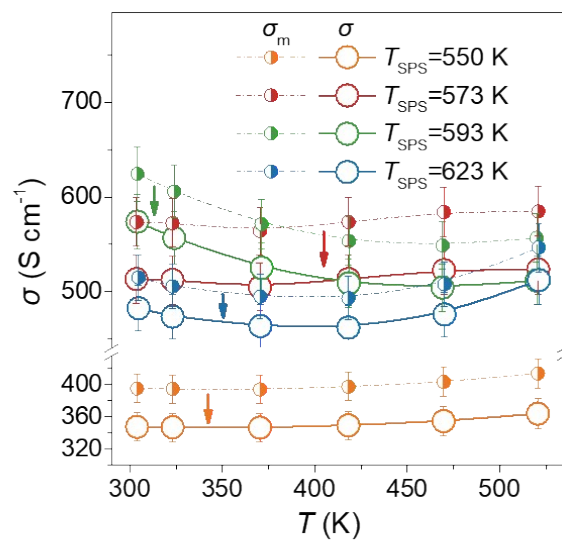

Fig. S2. Measured  $\sigma$  of as-prepared  $\text{Bi}_2\text{Te}_3$  pellets under different  $T_{\text{SPS}}$  in comparison with the  $\sigma_m$  extracted by parallel model.

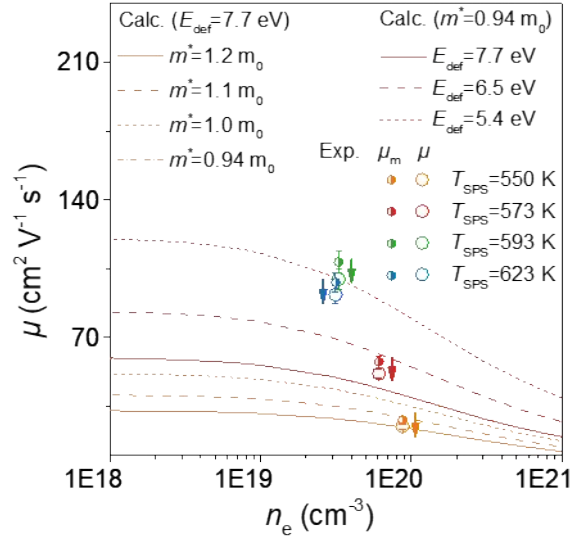

Fig. S3. Comparison between measured (under different  $T_{\text{SPS}}$ )  $\mu$ , extracted  $\mu_m$  and calculated (under different  $E_{\text{def}}$  and  $m^*$ )  $\mu$  as a function of  $n_e$ , at 370 K.

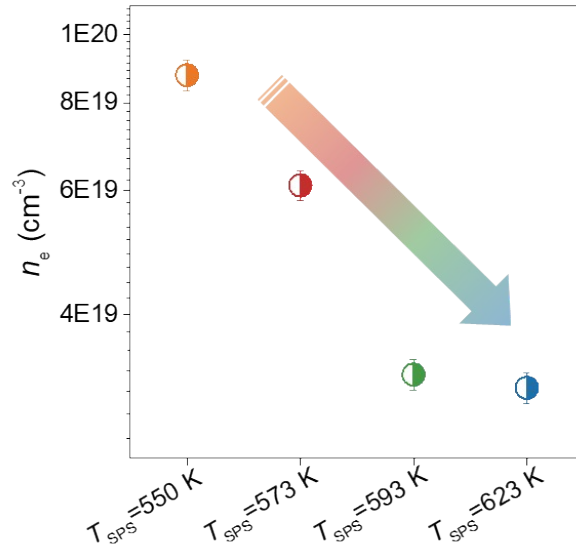

Fig. S4. Measured  $n_e$  of  $\text{Bi}_2\text{Te}_3$  pellets sintered under  $T_{\text{SPS}}$  of 550, 573, 593 and 623 K, respectively.

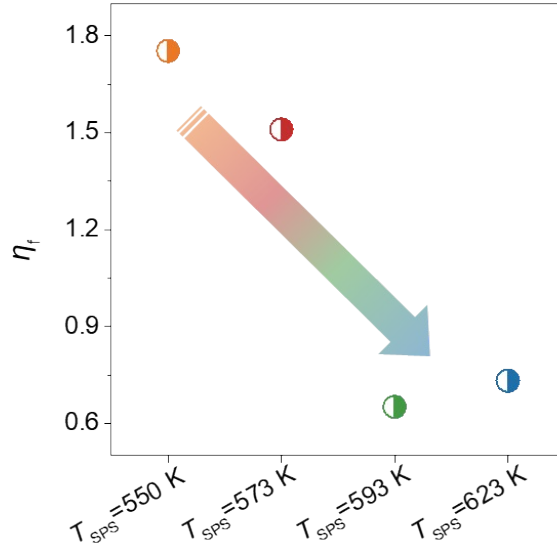

Fig. S5. SPB model extracted  $\eta_f$  of  $\text{Bi}_2\text{Te}_3$  pellets sintered under  $T_{\text{SPS}}$  of 550, 573, 593 and 623 K, respectively.

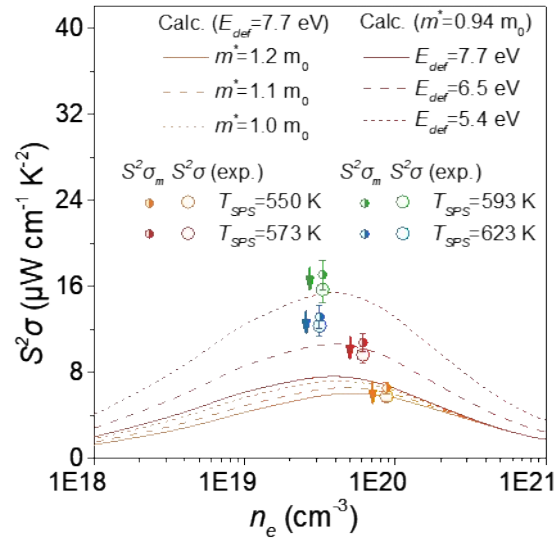

Fig. S6. Comparison between measured (under different  $T_{\text{SPS}}$ )  $S^2\sigma$ , extracted  $S^2\sigma_m$  and calculated (under different  $E_{\text{def}}$  and  $m^*$ )  $S^2\sigma$  as a function of  $n_e$ , at 370 K.

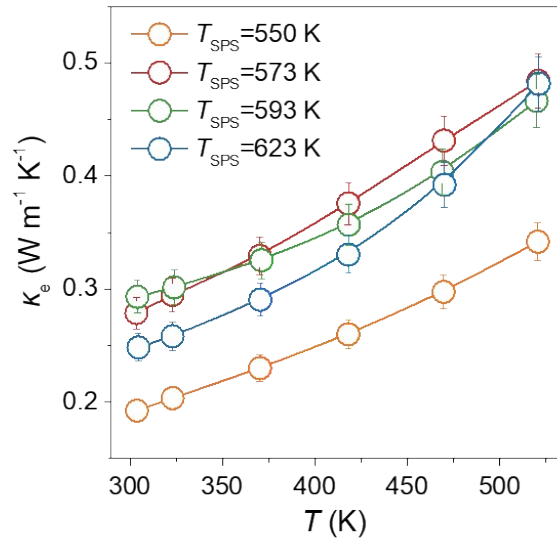

Fig. S7. Extracted  $\kappa_e$  of  $\text{Bi}_2\text{Te}_3$  pellets sintered under  $T_{SPS}$  of 550, 573, 593 and 623 K, respectively.

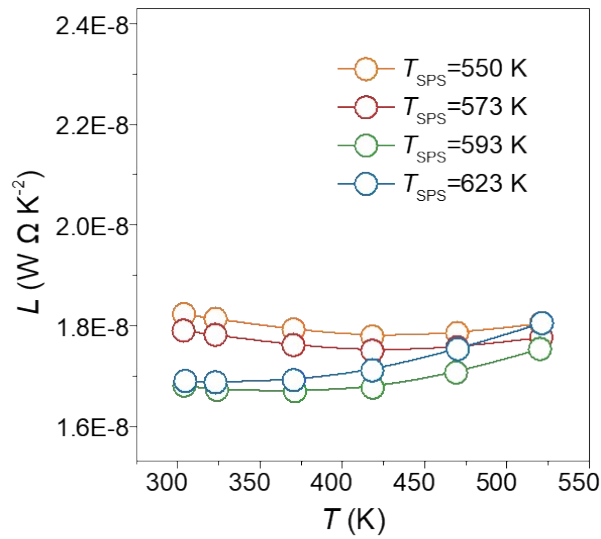

Fig. S8. Extracted  $L$  of  $\text{Bi}_2\text{Te}_3$  pellets sintered under  $T_{SPS}$  of 550, 573, 593 and 623 K, respectively.

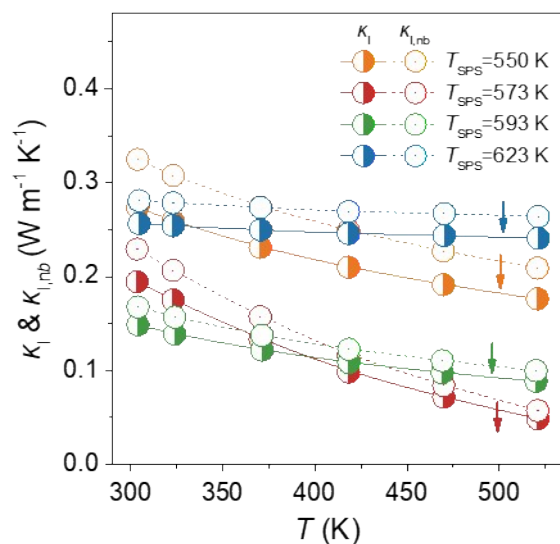

Fig. S9. Comparison between evaluated  $\kappa_1$  of  $\text{Bi}_2\text{Te}_3$  pellets prepared under different  $T_{\text{SPS}}$  and the gray medium model-evaluated  $\kappa_{1,nb}$  of nanobulks without pores.

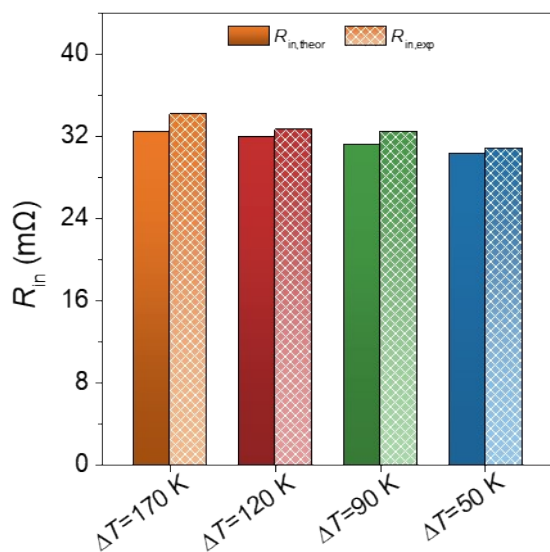

Fig. S10. Measured  $R_{\text{in}}$  of the of a single-leg device prepared based on the  $\text{Bi}_2\text{Te}_3$  pellet sintered under the  $T_{\text{SPS}}$  of 593 K under different  $\Delta T$ , comparing with the theoretical values.

Table S1. Comparison of key carrier transport properties evaluated by SPB model of  $\text{Bi}_2\text{Te}_3$  pellets prepared under different  $T_{\text{SPS}}$  and those of  $\text{Bi}_2\text{Te}_3$  matrixes (denoted by m) extracted by parallel model.

| $T_{\text{SPS}}$ (K) | $n_e$ ( $\text{cm}^{-3}$ ) | $\mu$ ( $\text{cm}^2 \text{V}^{-1} \text{s}^{-1}$ ) | $\mu_m$ ( $\text{cm}^2 \text{V}^{-1} \text{s}^{-1}$ ) | $m^*$ ( $m_0$ ) | $m_m^*$ ( $m_0$ ) | $E_{\text{def}}$ (eV) | $E_{\text{def,m}}$ (eV) |
|----------------------|----------------------------|-----------------------------------------------------|-------------------------------------------------------|-----------------|-------------------|-----------------------|-------------------------|
| 550                  | 8.76E+19                   | 24.7                                                | 28.1                                                  | 1.17            | 1.17              | 7.68                  | 7.20                    |
| 573                  | 6.11E+19                   | 51.6                                                | 57.6                                                  | 1.02            | 1.02              | 6.51                  | 6.16                    |
| 593                  | 3.29E+19                   | 99.6                                                | 108.4                                                 | 0.94            | 0.94              | 5.44                  | 5.22                    |
| 623                  | 3.15E+19                   | 91.9                                                | 98.0                                                  | 0.84            | 0.84              | 6.58                  | 6.37                    |

## References

1. H. Yao, Z. Fan, H. Cheng, X. Guan, C. Wang, K. Sun and J. Ouyang, *Macromol. Rapid. Comm.*, 2018, **39**, 1700727.
